1       **Transfer rate of enveloped and non-enveloped viruses between fingerpads and surfaces**

2                                    Claire E. Anderson<sup>a</sup> and Alexandria B. Boehm<sup>a\*</sup>

3

4       <sup>a</sup> Department of Civil and Environmental Engineering, Stanford University, Stanford, CA, 94305

5       \*Author to whom correspondence should be addressed: Alexandria Boehm,

6       aboehm@stanford.edu , 650-724-9128

7

8       **Running Title:** Transfer rate of viruses between fingers and surfaces

9

10       **Abstract**

11       Fomites can represent a reservoir for pathogens, which may be subsequently transferred from  
12       surfaces to skin. In this study we aim to understand how different factors (including virus type,  
13       surface type, time since last handwash, and direction of transfer) affect virus transfer rates,  
14       defined as the fraction of virus transferred, between fingerpads and fomites. To determine this,  
15       360 transfer events were performed with 20 volunteers using Phi6 (a surrogate for enveloped  
16       viruses) and MS2 (a surrogate for non-enveloped viruses), and three clean surfaces (stainless  
17       steel, painted wood, and plastic). Considering all transfer events (all surfaces and both transfer  
18       directions combined), the mean transfer rates of Phi6 and MS2 were 0.17 and 0.26, respectively.  
19       Transfer of MS2 was significantly higher than Phi6 (P<0.05). Surface type was a significant  
20       factor that affected the transfer rate of Phi6: Phi6 is more easily transferred to and from stainless  
21       steel and plastic than to and from painted wood. Direction of transfer was a significant factor  
22       affecting MS2 transfer rates: MS2 is more easily transferred from surfaces to fingerpads than  
23       from fingerpads to surfaces. Data from these virus transfer events, and subsequent transfer rate

24 distributions, provide information which can be used to refine quantitative microbial risk  
25 assessments. This study is the first to provide a large-scale data set of transfer events with a  
26 surrogate for enveloped viruses, which extends the reach of the study to the role of fomites in the  
27 transmission of human enveloped viruses like influenza and SARS-CoV-2.

28

### 29 **Importance**

30 This study created the first large-scale data set for the transfer of enveloped viruses between skin  
31 and surfaces. The data set produced by this study provides information on modelling the  
32 distribution of enveloped and non-enveloped virus transfer rates, which can aid in the  
33 implementation of risk assessment models in the future. Additionally, enveloped and non-  
34 enveloped viruses were applied to experimental surfaces in an equivalent matrix to avoid matrix  
35 effects, so results between different viral species can be directly compared without confounding  
36 effects of different matrices. Our results indicating how virus type, surface type, time since last  
37 handwash, and direction of transfer affect virus transfer rates can be used in decision-making  
38 processes to lower the risk of viral infection from transmission through fomites.

39

40 **Keywords:** virus transfer, fomites, surfaces, hand hygiene, bacteriophages

41

### 42 **Introduction**

43 Viruses are deposited in the environment when fluids (mucus, saliva, urine, feces)  
44 containing high viral titer are released from an infected individual (1, 2). Humans can come into  
45 contact with viruses when they consume or recreate in virus-contaminated water, eat  
46 contaminated food, breathe contaminated air, or touch contaminated fomites. When transmission

47 of a virus occurs via an environmental intermediary, the transmission is referred to as “indirect”.  
48 It is well-understood that indirect transmission is important for many viruses including those that  
49 cause diarrheal illness, influenza, COVID-19, and measles (2–7). While it is well known that  
50 fomite-mediated transmission is an important pathway for many diseases, several studies have  
51 emphasized the need for more information about inactivation rates, transfer rates, and pathogen  
52 shedding in order to develop accurate exposure and risk models (2, 3, 6, 8, 9).

53       Transmission of viruses via contaminated fomites requires multiple steps (Figure 1).  
54 First, a susceptible individual must come into the contact with the surface. Second, viruses are  
55 transferred between the fomite and the susceptible individual. Third, the virus transferred via  
56 touch is transmitted to the individual. The last step may require an additional transfer event from  
57 the part of the body that touched the fomite to another part of the body where infection occurs  
58 (sometimes referred to as self-inoculation). Whether the transmission event results in infection  
59 depends on the biology of the virus and the immune system of the individual. Infected  
60 individuals can also deposit viruses onto fomites via touch if there is virus present on their body,  
61 thereby contaminating fomites with viruses. In the present study, we are particularly focused on  
62 the transfer of viruses to and from skin and fomites.

63       Six studies have characterized the transfer of viruses to and from skin and inanimate  
64 surfaces and they have been primarily been undertaken using non-enveloped viruses (Table 1) (1,  
65 5, 10–13). This collection of studies includes virus transfer studies that explicitly quantified  
66 transfer rates between human skin and non-food surfaces (14) (see Table 1 of Zhao et al. (14) for  
67 a complete list of all virus transfer studies). These studies quantified transfer of MS2 (1, 10),  
68 poliovirus 1 (1), human parainfluenza virus (5), rhinovirus (5, 13),  $\phi$ X174 (10), fr (10), rotavirus  
69 (11), and hepatitis A (12). Of these viruses, only human parainfluenza is enveloped. When

70 investigating human parainfluenza virus transfer between skin and surfaces, Ansari et al. (5)  
71 found that the virus inactivated quickly and therefore it was impossible to quantify the transfer  
72 rate. Although experimental variables such as humidity, surface type, and virus type vary for  
73 each study, aspects of the experimental procedures remain relatively consistent for each study.  
74 Four of the six studies (1, 5, 11, 12) have an inoculation volume of 10  $\mu\text{L}$ , a contact time of 5-10  
75 seconds, 20-30 minutes of inoculum dry time, and a contact pressure of 1  $\text{kg}/\text{cm}^2$ . All 6 studies  
76 quantify virus transfer rate which is defined as the fraction of virus transferred upon contact.  
77 Julian et al. (10) defines transfer rate as the PFU recovered from the non-inoculated surface over  
78 the total PFU recovered from both surfaces. One of the studies investigated transfer rates  
79 between both porous and nonporous fomites (1), while the rest studied only nonporous fomites.  
80 Across all 6 studies, transfer rate varied between  $<0.02$  to 0.80 for nonporous surfaces (1, 5, 10–  
81 13). The study investigating porous surfaces found a transfer rate of  $<0.07$  (1).

82 Zhao et al. (14) provide a mechanistic model of transfer rates between surfaces. Their  
83 model considers the physical and chemical mechanisms that control transfer. Their model  
84 suggests touch force, microbial diameter, inoculation volume, touch number by the same  
85 individual, rubbing, and humidity have a positive correlation with virus transfer. They also  
86 suggest donor roughness, touch number by different individuals, surface hardness, temperature,  
87 surface inoculation area, and surface touching area are negatively correlated to virus transfer.

88 There is presently no experimental data on transfer of enveloped viruses between skin  
89 and surfaces, so this study sought to fill that knowledge gap. We documented the transfer rate of  
90 enveloped and non-enveloped viruses between various surfaces and fingertips using human  
91 volunteers and 360 transfer events, creating the first large-scale data set for enveloped viruses.  
92 The data set produced by this study provides information on modelling the distribution of

93 enveloped and non-enveloped virus transfer rates, which can aids in the implementation of risk  
94 assessment models in the future (8, 15–17).

95 We also investigated how virus type, surface type, time since last handwash, and  
96 direction of transfer affect virus transfer rates. The choice of variables is informed by results of  
97 previous studies and the model developed by Zhao et al. (14). Enveloped and non-enveloped  
98 viruses were applied to experimental surfaces in an equivalent matrix in order to avoid matrix  
99 effects, so the results obtained with different viral species can be directly compared without  
100 confounding effects of different matrices.

101 The enveloped virus used in this study is Phi6. Phi6 has a dsRNA genome and is  
102 spherical in shape with ~80-100 nm diameter; the protein nucleocapsid is surrounded by a lipid  
103 membrane and thus, it serves as a non-pathogenic, biosafety-level 1 bacteriophage surrogate for  
104 enveloped human pathogenic viruses, such as influenza, SARS-CoV-2, and Ebola. The non-  
105 enveloped virus used in this study is MS2. MS2 has an ssRNA genome and has an icosahedral  
106 protein shell ~27 nm in diameter. MS2 similarly acts as a biosafety level-1 bacteriophage  
107 surrogate for non-enveloped human pathogenic viruses such as norovirus and enteroviruses. Phi6  
108 and MS2 have been previously applied to hands to model pathogenic viruses (10, 18–20).

109

## 110 **Results**

111 **Experimental Conditions.** A total of 20 volunteers participated in the study. They  
112 ranged in age from 22 to 58 years, with the median age being 26. Volunteer hand length ranged  
113 from 16.2 cm to 21.9 cm, with the median length being 19.3 cm. Volunteer hand breadth ranged  
114 from 7.3 cm to 10 cm, with a median breadth of 8.1 cm. Temperature of the laboratory  
115 throughout the study ranged from 20.8°C to 21.9°C, with a median temperature of 21.7°C.

116 Relative humidity during the study ranged from 13% to 74%, with a median value of 58%. Full  
117 temperature and humidity data are available in the SI.

118 **Transfer Rate Distributions.** All negative controls had 0 PFU and all viral stock  
119 concentrations had an expected number of PFU/mL.

120 The fraction of virus transferred ( $f$ ) was determined for 360 transfer events for the two  
121 viruses. Out of the 360 transfer events for Phi6, all three dilutions plated were TNTC 8 times. All  
122 three dilutions were lower than the detection limit 38 times. As a result, 46 transfer events were  
123 removed from the data set for Phi6, leaving 314. Out of the 360 transfer events for MS2, there  
124 were no instances where all dilutions exceeded the limit of detection. The three dilutions were  
125 lower than the detection limit 4 times for MS2. As a result, 4 transfer events were removed from  
126 the data set for MS2, leaving 356. The instances where the transfer rate was irrecoverable for  
127 Phi6 and MS2 are not limited to a single surface, time since last handwash, or direction of  
128 transfer. The instances also make up less than 7% of the total data, and therefore are not  
129 anticipated to affect the overall distribution of the data. More information about these instances  
130 of irrecoverable transfer rates can be found in Table 2.

131 The mean transfer rate for Phi6 was 0.17, while the median was 0.12 and the standard  
132 deviation was 0.17. For MS2, the mean transfer rate was 0.26, the median was 0.25, and the  
133 standard deviation was 0.18 (Figures 3 and 4). The respective means, medians, and standard  
134 deviations of the transfer rate based on the variables investigated (virus type, surface type, time  
135 since last handwash, and direction of transfer) can be found in Table 2 and Figure 3.

136 Several distributions (including normal, lognormal, exponential, geometric, and beta)  
137 were fit to the data and the goodness of fit for each was tested through a Kolomogov-Smirnoff  
138 test, comparing the log-likelihood, and comparing the Akaike's Information Criterion (AIC).

139 Overlaid on the histogram in Figure 4 is the distribution that best fit the data of the distributions  
140 tested, along with the distribution parameters. In the case of both virus type, beta distributions fit  
141 the data best. For each virus, the beta distribution had the highest log-likelihood estimate, the  
142 lowest AIC, and a p-value greater than 0.05. Although the normal distribution fit the data well (a  
143 p-value of 0.46 and 0.54 for Phi6 and MS2, respectively), it was not used because it included the  
144 possibility of negative transfer fraction values, which are physically unrealistic.

145 **Significant Factors Controlling Transfer Rate.** An n-way ANOVA on the complete  
146 data set indicates that ‘virus type’ ( $P < 0.001$ ), ‘surface type’ ( $P < 0.001$ ), and ‘direction of transfer’  
147 ( $P < 0.001$ ) are significant factors in controlling transfer. An ANOVA is justified for analyzing  
148 these data as the Kolmogov-Smirnoff tested suggested the data could be reasonable  
149 approximated as normal. The ‘time since last handwash’ factor was not significant in the model  
150 ( $P = 0.87$ ). In terms of interactions between variables, significant two-way interactions were found  
151 between the ‘virus type’ and ‘surface type’, the ‘virus type’ and ‘time since last handwash’, and  
152 ‘surface-type’ and ‘time since last handwash’. The remaining unlisted interactions were not  
153 statistically significant. To parse through these interaction terms, two three-way ANOVAs were  
154 performed with Phi6 and MS2 as the dependent variables, separately.

155 A three-way ANOVA performed with Phi6 transfer rate as the dependent variable  
156 indicates that surface type is significant ( $P < 0.001$ ). The post-hoc test shows that there are  
157 differences between wood and plastic (mean difference between wood and plastic = -0.13,  
158  $P < 0.001$ ) and wood and stainless steel (mean difference between wood and stainless steel = -  
159 0.12,  $P < 0.001$ ), but no difference between stainless steel and plastic ( $P = 0.97$ ). Direction of  
160 transfer ( $P = 0.16$ ) and time since last handwash ( $P = 0.24$ ) are not significant factors in the model.  
161 There is no statistically significant three-way interaction between ‘surface type’, ‘direction of

162 transfer', or 'time since last handwash' (P=0.14). In terms of possible two-way interactions, the  
163 only significant interaction occurs between 'surface type' and 'direction of transfer' (P=0.014);  
164 the direction of transfer was found to only significantly impact the transfer rate between  
165 fingerpads and plastic (mean difference between finger to plastic transfer and plastic to finger  
166 transfer = -0.09).

167 A separate three-way ANOVA performed for all MS2 data indicates that direction of  
168 transfer is the only significant variable (P<0.001). The post-hoc test shows that the mean  
169 difference between fingerpad to surface transfer and surface to fingerpad transfer is -0.18.  
170 Surface type (P=0.71) and time since last handwash (P=0.23) were not found to be significant.  
171 Similarly to Phi6, there is no statistically significant three-way interaction between surface type,  
172 direction of transfer, or time since last handwash (P=0.73). The only significant two-way  
173 interaction occurs between the surface type and direction of transfer (P=0.003). The direction of  
174 transfer significantly effects the transfer from all three surfaces, with a higher fraction transferred  
175 from surfaces to fingerpads for all surface types (a mean difference of 0.23 for plastic, 0.21 for  
176 stainless steel, and 0.10 for wood).

177

## 178 **Discussion**

179 Both enveloped and non-enveloped viruses are readily transferred between fomites and  
180 fingertips with transfer rates of 0.22, on average. This implies that a transfer of 22% of viruses  
181 on a surface to a fingerpad should be expected. Whether or not this transfer would result in a risk  
182 of fomite-mediated infection would depend on number of infectious viruses contacted by the  
183 fingertip, the efficiency of self-inoculation (i.e., transfer of virus from fingertip to the mouth,



184 nasal cavity, or other bodily location where infection may occur), the infectious dose of the virus,  
185 and the susceptibility of the individual.

186 The transfer rates reported in this study for MS2 and Phi6 are similar to virus transfers  
187 reported by others (1, 11, 12, 21). Specifically, the MS2 mean transfer rate of 0.26 is comparable  
188 to the MS2 mean transfer rate of 0.22 between fingertips and glass reported by Julian et al. (10)  
189 who used similar methods as those used herein. Previous work reported viral transfer rates  
190 between skin and fomites to range between 0.16 and 0.65 for non-porous surfaces (1, 10–12, 21).  
191 The higher values in this range were obtained using greater contact pressure and a shorter  
192 desiccation time for viral suspensions (1, 10, 12). According to a physical-chemical model of  
193 skin-surface microbial transfer (14), greater contact pressure will likely lead to higher transfers.  
194 Future work should explore the influence of this variable on viruses, and specifically non-  
195 enveloped viruses, experimentally.

196 Enveloped virus Phi6 is transferred between surfaces and fingerpads to a lesser extent  
197 than non-enveloped virus MS2. This might suggest that enveloped viruses are transferred less  
198 efficiently than non-enveloped viruses, however, the effect size is small (difference in mean  
199 transfer rate is ~0.1). Both experimental and modeling studies suggest that enveloped and non-  
200 enveloped viruses can be transmitted via fomites, and that this transmission requires transfer via  
201 a contact event and subsequent self-inoculation. For example, non-enveloped norovirus was  
202 shown experimentally in a case study to be transmitted via contaminated surfaces in a houseboat  
203 used by different groups in series (22). *Betaarterivirus suid 1*, an enveloped virus that infects  
204 pigs, was shown experimentally to be transmitted via contaminated fomites in a controlled  
205 animal exposure study (23). Zhao et al. (14) indicate fomites can be important in the spread of  
206 enveloped influenza viruses. Boone and Gerba (2) summarize evidence on the role of fomite-

207 mediated transmission of both enveloped and non-enveloped viruses from experimental studies  
208 and conclude its role can be important for both types of viruses. It will be important to repeat our  
209 study with a broader range of enveloped viruses to confirm the reduced transferability of  
210 enveloped versus non-enveloped viruses.

211 Enveloped virus transfer is higher from smooth plastic and metal surfaces than rough  
212 wooden surfaces. Although stainless steel, plastic, and wood are all considered non-porous  
213 surfaces, the surface of painted wood is inherently more irregular due to brush strokes. This  
214 suggests that the microvariations in the surface of the wood may create a less efficient transfer,  
215 and therefore a lower transfer rate of the virus. Such heterogeneities on the surface may prevent  
216 efficient contact between fingerpads and the surfaces. Previous studies have modelled that as  
217 donor roughness increases, the transfer rate decreases, based on touch probability and adhesive  
218 probability (14). However, as recipient roughness increases, the transfer rate correlation is  
219 nonmonotonic (14).

220 Non-enveloped viruses are more readily transferred from surfaces to fingerpads than  
221 from fingerpads to surfaces; the mean difference between surface to fingerpad and finger pad to  
222 surface transfer rate was found to be 0.23 for plastic, 0.21 for stainless steel, and 0.10 for wood.  
223 In previous studies that report that direction of transfer is important in controlling virus transfer,  
224 conclusions regarding the direction in which virus was more readily transferred differed based on  
225 virus type (5, 10, 12). This agrees with what was found in this study, where only MS2 showed a  
226 greater transfer from surfaces to fingerpads than from fingerpads to surfaces. A greater transfer  
227 from surfaces to fingerpads than from fingerpads to surfaces suggests individuals are able to pick  
228 up viral particles from a surface and may not be able to spread them to additional surfaces as  
229 easily. As a result, viruses may remain on the skin rather than be transferred off. Presence of

230 viruses on the hands and subsequent interaction with the nose, eyes, or mouth, may lead to self-  
231 inoculation and subsequent infection. A previous study found that the transfer rate for a non-  
232 enveloped virus (PRD-1) from fingertip to lip is roughly 34% (21). Additional work  
233 investigating skin-to-skin transfer rate, in combination with previous results of surface-to-skin  
234 transfer rate, can help develop a complete model of the disease transmission pathway.

235 We did not find that ‘time since last handwash’ affected transfer of virus between  
236 surfaces and fingerpads. In general, handwashing can change the physio-chemical properties of  
237 the skin including changing the pH, removing dirt or oil, or leaving behind trace soap chemicals  
238 (24). A previous study found that recently washed hands led to decreased transfer of non-  
239 enveloped viruses to and from fingerpads and glass and speculated this was a result of changes in  
240 moisture level, pH of skin, and other residual effects from the soap (10). Future work that  
241 investigates the effects of handwashing under different realistic scenarios, for example with  
242 hands that are unwashed for longer periods of time after work outdoors or shopping, may provide  
243 additional insights into whether hand washing reduces or facilitates virus transfer between  
244 fingerpads and surfaces. It is well understood that hand washing can remove viral pathogens  
245 from hands which serves to interrupt transmission pathways involving hand contacts (25).

246 There are several limitations to this study which have not already been mentioned. First,  
247 this study controlled contact pressure even though it is understood that this may affect transfer  
248 (12, 14). Additional work to include contact pressure as a variable may be useful. Second, this  
249 study worked with clean surfaces and relatively clean fingerpads. In reality, surfaces and  
250 fingerpads may be coated with dirt or oil and this could affect transfer rates by changing physio-  
251 chemical interactions between viruses and surfaces (14). Further work should consider the use of  
252 realistically soiled surfaces and hands, which may provide protection to pathogens when the

253 contact event occurs (26). Third, this study was restricted to two viruses and three surfaces. It  
254 would be interesting to expand on these in future studies to investigate whether the trends  
255 observed here for enveloped viruses can be confirmed with other surrogate, non-pathogenic  
256 enveloped viruses. Finally, our surface sampling technique may not recover all viruses from the  
257 surfaces swabbed. An inherent assumption in this work is that the recovery efficiency of virus  
258 from fingerpads and tested surfaces was not distinct, so that the transfer rate could be calculated  
259 without accounting for recovery efficiency (as recovery efficiency would cancel in the numerator  
260 and denominator of Equation 1). Recent work attempts to more accurately represent bacterial  
261 concentrations on surfaces using a sequential sampling method (14, 27). Future work should  
262 investigate the usefulness of this method for viruses and how its use might affect the calculation  
263 of transfer efficiencies.

264

## 265 **Materials and methods**

266 **Volunteers.** Volunteers for this study were enrolled with approval from the Stanford  
267 University Research Compliance Office for Human Subjects Research according to IRB-55010.  
268 15 volunteers participated per surface, similar to the number of volunteers used in previous  
269 studies on virus transfer (10, 18). All volunteers were allowed to participate in the study if they  
270 self-reported as healthy, had no visible sores on their hands or fingerpads, and had appropriate  
271 building access according to Stanford's COVID-19 Research Recovery Plan. The experiments  
272 were conducted in a room isolated from others, a 6-foot distance was maintained whenever  
273 possible, and facial masks were worn at all times according to Stanford's COVID-19 Research  
274 Recovery Plan. Once volunteers were informed of the risks of the experiment and consented, the  
275 age, gender, hand length, and hand breadth of the volunteers were recorded. Hand length and

276 breadth was recorded according to the National Aeronautics and Space Administration (28). The  
277 volunteer group consisted of 20 volunteers, 8 of whom self-identified as cis-male and 12 as cis-  
278 female. Of the 20 volunteers, 9 performed the experiment with all three surfaces, 8 with two  
279 surfaces, and 2 with just one surface.

280 **Virus preparation.** Phi6 and MS2 were applied to the surfaces and fingerpads together  
281 in the same aliquot to ensure viruses were suspended in equivalent aqueous matrix. An  
282 equivalent aqueous matrix is vital to ensure homogenous transfer conditions between the two  
283 viruses so that the effect of virus type can be deduced from the experiments. Each virus was  
284 diluted to the preferred titer with TSB and then the mixed in equal proportions. TSB was used as  
285 the matrix for the experiments to mimic an organic-rich media which better resembles bodily  
286 excretions like mucus, saliva, vomitus, and feces than a buffer or water solution.

287 Phi6 (NBRC 105899) and its host *Pseudomonas syringae* (*P. syringae*, ATCC#21781)  
288 were obtained from the University of Michigan. To propagate *P. syringae*, 30 mL of nutrient  
289 broth (described in the SI) was inoculated with a loop of *P. syringae* stock from -80°C and  
290 incubated while shaking at 30°C for 48 hours until experiment use. The propagated host was  
291 kept at 30°C and used for additional experiments up to 48 hours after initial use. Phi6 virus stock  
292 was created using the method described in the Supplemental Information (SI) following Wolfe et  
293 al. (18).

294 MS2 (DMS No. 13767) and its host *Escherichia coli* (*E. coli*, DMS No. 5695) were  
295 purchased from DSMZ German Collection of Microorganisms and Cell Cultures. 20 mL of  
296 tryptic soy broth (TSB, pH of  $7.3 \pm 0.2$ ) was inoculated with 20  $\mu$ L *E. coli* stock from -80°C and  
297 then incubated at 37°C until the growth phase was logarithmic (about 6 hours), then it was used  
298 immediately for experiments. MS2 virus stock was created using the method described in the SI.

299           **Surface preparation.** Samples of the three surfaces were obtained from Home Depot  
300 (East Palo Alto, CA, USA). Stainless steel and plastic were light switch cover plates, while  
301 painted wood was poplar cut to approximately the same size as the light switch cover plates and  
302 painted with interior acrylic semigloss paint (Figure SI.1). 2 cm squares were delineated on the  
303 surfaces using permanent marker. To sterilize each surface, the surface was washed with  
304 antibacterial soap, soaked in a 10% bleach solution, triple rinsed with DI water, and dried with a  
305 Kleenex scientific cleaning wipe (Kimberly-Clark, Irving, TX, USA).

306           **Experimental protocol. Overview.** The experimental design of this study was modified  
307 from Julian et al. (Figure 2) (10). The experiment can be broken down into two parts,  
308 Experiment A and Experiment B. The experiments have the same setup but differ in the length of  
309 time since last handwash. Experiment A took place an hour after the volunteer washed their  
310 hands with soap and water, while Experiment B took place immediately after handwashing. In  
311 both experiments, a donor surface, which represents the contaminated surface, was inoculated  
312 with the viruses and the virus inoculum was allowed to dry to mimic the desiccation that can  
313 occur during natural contamination events. The donor surface could be one of the three non-  
314 porous surfaces tested or could be a fingerpad depending on the direction of transfer. Depending  
315 on the volunteer's schedule, with some volunteers an additional second surface was tested  
316 immediately after the first. In all instances, the contact event then took place with the recipient  
317 surface (the clean surface(s) or fingerpad depending on the direction of transfer). Samples were  
318 recovered from both the donor and recipient surfaces. After Experiment A, the volunteer washed  
319 their hands using the same technique as in the beginning of the study, and immediately  
320 Experiment B took place. After Experiment B the volunteer washed their hands a final time and  
321 the experiment concluded.

322           *Detailed Experimental Protocol.* A 2 cm x 2 cm square of donor surface (steel, plastic,  
323 wood, or fingertip) was inoculated with 10  $\mu$ L of pooled virus stock containing both MS2 and  
324 Phi6. Virus stock consisted of TSB with  $\sim 10^5$  PFU MS2 /mL and between  $10^8$  PFU Phi6/mL and  
325  $10^{10}$  PFU Phi6/mL. The higher Phi6 titer stock was used for fingerpad and painted wood donor  
326 surfaces while the lower Phi6 stock was used for stainless steel and plastic surfaces. The  
327 different Phi6 titers were required to obtain countable plaques from the recipient surfaces.  
328 Temperature and relative humidity of the room during the experiment were recorded using a  
329 ThermoPro TP49 Digital Hygrometer.

330           An hour prior to Experiment A, volunteers were asked by the technician to wash their  
331 hands with antibacterial liquid hand soap (Colgate-Palmolive, New York, NY, USA) for 15  
332 seconds, rinse them in tap water, and dry them with a Kleenex scientific cleaning wipe  
333 (Kimberly-Clark, Irving, TX, USA). They were asked to refrain from using the restroom, eating  
334 food, and wearing latex gloves until the start of the experiment. For each volunteer, one surface  
335 to be tested was chosen through a random number generator from 1-3 (1=Stainless steel,  
336 2=Plastic, and 3=Painted wood). An optional second surface to be tested the same day was also  
337 randomly chosen from the remaining 2 surfaces. Next, the finger corresponding to each direction  
338 of transfer and the finger used as a control were chosen through a random number generator from  
339 1-5 (1=Thumb, 2=Index, 3=Middle, 4=Ring, 5=Pinky). With each volunteer, one finger served  
340 as a recipient for the chosen surface (surface-to-fingerpad transfer), one finger served as a donor  
341 for the chosen surface (fingerpad-to-surface transfer), one finger served as a recipient for the  
342 second optional surface (surface-to-fingerpad transfer), one finger served as a donor for the  
343 second optional surface (fingerpad-to-surface transfer), and one finger served as a control  
344 (Figure 2). Collection of control samples, where the virus was not applied to the finger, ensured

345 that there were no viruses present on the hand or surface, and no cross-contamination present.  
346 The right and left hands served as duplicates of one another, and as a result the designations were  
347 identical for each hand (Figure 2). The viruses were distributed on both the appropriate surface  
348 and fingerpads in a grid of small dots (about 0.75  $\mu$ L per dot) for even distribution and were  
349 allowed to visibly dry. This grid was adjusted for each finger, as they had unique sizes, but was  
350 approximately a 4x4 grid for surfaces. For surfaces, the drying time typically took about 30  
351 minutes, while for fingerpads it took about 5 minutes.

352 After the inoculum on the donor surface was visibly dry, the contact event took place.  
353 The volunteer contacted the surface for 10 s at a pressure of 25 kPa. The appropriate pressure  
354 was administered using a triple-balance beam set to 500 g. This pressure is comparable to a child  
355 gripping an object, the pressure of adult fingerpads exerted locally on a hand tool, and studies  
356 examining transfer of soil from surfaces to skin (29–31). Upon completion of the contact event, a  
357 cotton swab wetted with TSB was used to remove the virus from both the donor and recipient  
358 surfaces. The swab was swiped firmly across the surface for 10 s using a sweeping motion. The  
359 swab was then placed in 1000  $\mu$ L of TSB and vortexed for 10 s.

360 After Experiment A was complete, the volunteer was asked to use alcohol-based hand  
361 sanitizer (ABHS) and then wash their hands using the same method they used at the start of the  
362 experiments. Immediately after washing, Experiment B was initiated using the same surface(s),  
363 and the same fingerpad donor/recipient designations as Experiment A. Experiment B was carried  
364 out in the exact same manner as Experiment A. At the end of Experiment B, volunteers were  
365 asked to use ABHS again and to wash their hands a final time.



366 After the volunteer left the experiment, the samples were vortexed, diluted 1:10 and  
367 1:100 using TSB, and then stored at 4°C for a maximum of 8 hours until the plaque assays were  
368 performed.

369 **Quantification.** To enumerate Phi6 and MS2 in the samples, traditional double agar  
370 plaque assays were used. The Phi6 plaque assay followed Wolfe et al. (see SI) (18). Briefly, soft  
371 agar (0.3% agar) was inoculated with 100 µL of sample and 100 µL of *P. syringae* host, then the  
372 mixture was poured onto hard agar plates (2.3% agar). The MS2 plaque assay is based on EPA  
373 method 1602 (32). Briefly, soft agar (0.7% agar) was inoculated with 300 µL of sample and 200  
374 µL of *E. coli* host, then pouring the mixture onto hard agar plates (1.5% agar).

375 Three dilutions of each sample were assayed, including undiluted, 1:10 dilution, and  
376 1:100 dilution samples. In addition, a negative control for each hand and surface was included  
377 for each volunteer. The negative control consisted of performing the contact event with a surface  
378 and fingerpad that were not inoculated with the virus, swabbing the recipient surface, and  
379 processing the swab sample using the plaque assay described. The viral stock concentration was  
380 enumerated in each experiment, confirming the plaque assay was working correctly even if no  
381 plaque were observed in the surface transfer results. The Phi6 and MS2 hard agar plates were  
382 incubated at 30°C and 37°C, respectively, for 18 hours before plaques were counted as PFUs.  
383 The number of PFUs were counted if the number was between 1 and 500. If there were more  
384 than 500 PFU, TNTC (too numerous to count) was recorded. If there were no PFU, then a 0 was  
385 recorded.

386 **Data Analysis.** The transfer rate was calculated using the Equation 1. In this equation,  
387 the transfer rate ( $r$ ) is defined as the mean PFU times the appropriate dilution factor measured on  
388 the recipient surface ( $R_R$ ) divided by the sum of the mean PFU times the appropriate dilution

389 factors recovered from both the recipient surface and donor surface ( $R_D$ ). Dilution factor is  
390 defined as 1 for undiluted sample, 0.1 for 1:10 diluted, and 0.01 for 1:100 diluted samples. The  
391 recovered PFU times the dilution factor was used in the denominator rather than the applied  
392 concentration, as desiccation results in a loss of viral titer (10) and we sought to quantify transfer  
393 specifically without considering effects of desiccation:

$$r = \frac{R_R}{(R_R + R_D)} \quad (1)$$

394 A sample is defined as an individually collected swab of the virus. Each contact event  
395 results in two samples, one from the finger swab and one from the surface swab. There are two  
396 levels of replication when quantifying the samples for each of the 15 volunteers. The first are the  
397 biological replicates created by the duplicate hand profiles of each volunteer. The second are the  
398 technical replicates created from the multiple dilutions of each sample. For the purpose of the  
399 data analysis, no separation of the biological replicates was attempted. All available technical  
400 replicates were multiplied by their appropriate dilution factors and averaged to obtain one  
401 recovery from the recipient surface and one recovery value from the donor surface. These are the  
402 values then used in Equation 1. Inclusion of the technical replicates can be approached in many  
403 ways other than the one chosen (such as only choosing the dilutions that yielded the lowest  
404 transfer rate or only using dilutions between a certain range of PFU). Different approaches were  
405 tried in the data analysis and no differences in results was noted (details not shown).

406 Data cleaning and the calculation of the transfer rate was performed in MATLAB  
407 (MATLAB R2020a; The MathWorks; Natick, United States). If the PFU count was recorded as  
408 TNTC or 0 for either the donor or recipient surface, the data for the transfer event was removed.  
409 Descriptive statistics (mean, median, and standard deviations) and statistically modeling  
410 functions were calculated in R (R: A Language for Statistical Computing, version 1.2.5042; R

411 Foundation for Statistical Computing, Vienna, Austria). Beta distributions were fit to the data  
412 using a univariate maximum likelihood estimation. The goodness of fit was determined through  
413 Kolmogov-Smirnoff tests. An n-way ANOVA was used to test the hypotheses that virus type,  
414 surface type, time since last handwash, and direction of transfer were significant experimental  
415 factors of the virus transfer rate. The n-way ANOVA was followed by a Tukey Honestly  
416 Significant Difference post-hoc test. ANOVA assumption testing (including blocking and  
417 homoscedasticity) is contained in the SI. A significance level of  $\alpha=0.05$  was used in this  
418 assessment.

419

#### 420 **Acknowledgments**

421 This work was supported by NSF RAPID (CBET-2023057) to A.B.B. and an NSF-GRF to C. A.  
422 We acknowledge the volunteers without whom this study would not have been possible. We also  
423 thank Krista Wigginton, Stephanie Loeb, and Marlene Wolfe for their help with virus  
424 propagation protocols, and members of the Boehm lab who reviewed and edited this paper. This  
425 study was performed on the ancestral and unceded lands of the Muwekma Ohlone people. We  
426 pay our respects to them and their Elders, past and present, and are grateful for the opportunity to  
427 live and work there.

428

#### 429 **References**

- 430 1. Lopez GU, Gerba CP, Tamimi AH, Kitajima M, Maxwell SL, Rose JB. 2013. Transfer  
431 Efficiency of Bacteria and Viruses from Porous and Nonporous Fomites to Fingers under  
432 Different Relative Humidity Conditions. *Appl Environ Microbiol* 79:5728–5734.

- 433 2. Boone SA, Gerba CP. 2007. Significance of Fomites in the Spread of Respiratory and  
434 Enteric Viral Disease. *Appl Environ Microbiol* 73:1687–1696.
- 435 3. Kraay ANM, Hayashi MAL, Hernandez-Ceron N, Spicknall IH, Eisenberg MC, Meza R,  
436 Eisenberg JNS. 2018. Fomite-mediated transmission as a sufficient pathway: a comparative  
437 analysis across three viral pathogens. *BMC Infectious Diseases* 18:540.
- 438 4. WHO. Transmission of SARS-CoV-2: implications for infection prevention precautions.
- 439 5. Ansari SA, Springthorpe VS, Sattar SA, Rivard S, Rahman M. 1991. Potential role of hands  
440 in the spread of respiratory viral infections: studies with human parainfluenza virus 3 and  
441 rhinovirus 14. *J Clin Microbiol* 29:2115–2119.
- 442 6. Castaño N, Cordts SC, Kurosu Jalil M, Zhang KS, Koppaka S, Bick AD, Paul R, Tang  
443 SKY. 2021. Fomite Transmission, Physicochemical Origin of Virus–Surface Interactions,  
444 and Disinfection Strategies for Enveloped Viruses with Applications to SARS-CoV-2. *ACS*  
445 *Omega* 6:6509–6527.
- 446 7. Bischoff WE, McNall RJ, Blevins MW, Turner J, Lopareva EN, Rota PA, Stehle JR Jr.  
447 2016. Detection of Measles Virus RNA in Air and Surface Specimens in a Hospital Setting.  
448 *The Journal of Infectious Diseases* 213:600–603.
- 449 8. Nicas M, Jones RM. 2009. Relative contributions of four exposure pathways to influenza  
450 infection risk. *Risk Anal* 29:1292–1303.

- 451 9. Stephens B, Azimi P, Thoemmes MS, Heidarinejad M, Allen JG, Gilbert JA. 2019.  
452 Microbial Exchange via Fomites and Implications for Human Health. *Curr Pollution Rep*  
453 5:198–213.
- 454 10. Julian TR, Leckie JO, Boehm AB. 2010. Virus transfer between fingerpads and fomites.  
455 *Journal of Applied Microbiology* 109:1868–1874.
- 456 11. Ansari SA, Sattar SA, Springthorpe VS, Wells GA, Tostowaryk W. 1988. Rotavirus  
457 survival on human hands and transfer of infectious virus to animate and nonporous  
458 inanimate surfaces. *J Clin Microbiol* 26:1513–1518.
- 459 12. Mbithi JN, Springthorpe VS, Boulet JR, Sattar SA. 1992. Survival of hepatitis A virus on  
460 human hands and its transfer on contact with animate and inanimate surfaces. *J Clin*  
461 *Microbiol* 30:757–763.
- 462 13. Reed SE. 1975. An investigation of the possible transmission of Rhinovirus colds through  
463 indirect contact. *J Hyg (Lond)* 75:249–258.
- 464 14. Zhao P, Li Y. 2021. Modeling and Experimental Validation of Microbial Transfer via  
465 Surface Touch. *Environ Sci Technol* 55:4148–4161.
- 466 15. Pitol AK, Julian TR. 2021. Community Transmission of SARS-CoV-2 by Surfaces: Risks  
467 and Risk Reduction Strategies. *Environ Sci Technol Lett* 8:263–269.
- 468 16. Mizukoshi A, Nakama C, Okumura J, Azuma K. 2021. Assessing the risk of COVID-19  
469 from multiple pathways of exposure to SARS-CoV-2: Modeling in health-care settings and  
470 effectiveness of nonpharmaceutical interventions. *Environ Int* 147:106338.

- 471 17. Jones RM. 2020. Relative contributions of transmission routes for COVID-19 among  
472 healthcare personnel providing patient care. *Journal of Occupational and Environmental*  
473 *Hygiene* 17:408–415.
- 474 18. Wolfe MK, Gallandat K, Daniels K, Desmarais AM, Scheinman P, Lantagne D. 2017.  
475 Handwashing and Ebola virus disease outbreaks: A randomized comparison of soap, hand  
476 sanitizer, and 0.05% chlorine solutions on the inactivation and removal of model organisms  
477 Phi6 and *E. coli* from hands and persistence in rinse water. *PLOS ONE* 12:e0172734.
- 478 19. Casanova LM, Weaver SR. 2015. Evaluation of eluents for the recovery of an enveloped  
479 virus from hands by whole-hand sampling. *J Appl Microbiol* 118:1210–1216.
- 480 20. Pitol AK, Bischel HN, Boehm AB, Kohn T, Julian TR. 2018. Transfer of Enteric Viruses  
481 Adenovirus and Coxsackievirus and Bacteriophage MS2 from Liquid to Human Skin. *Appl*  
482 *Environ Microbiol* 84:e01809-18, /aem/84/22/e01809-18.atom.
- 483 21. Rusin P, Maxwell S, Gerba C. 2002. Comparative surface-to-hand and fingertip-to-mouth  
484 transfer efficiency of gram-positive bacteria, gram-negative bacteria, and phage. *Journal of*  
485 *Applied Microbiology* 93:585–592.
- 486 22. Jones EL, Kramer A, Gaither M, Gerba CP. 2007. Role of fomite contamination during an  
487 outbreak of norovirus on houseboats. *International Journal of Environmental Health*  
488 *Research* 17:123–131.
- 489 23. Otake S, Dee SA, Rossow KD, Deen J, Joo HS, Molitor TW, Pijoan C. 2002. Transmission  
490 of porcine reproductive and respiratory syndrome virus by fomites (boots and coveralls).  
491 *Journal of Swine Health and Production* 10:59–65.

- 492 24. Gfatter R, Hackl P, Braun F. 1997. Effects of soap and detergents on skin surface pH,  
493 stratum corneum hydration and fat content in infants. *Dermatology* 195:258–262.
- 494 25. World Health Organization. 2017. Evidence of hand hygiene as the building block for  
495 infection prevention and control: an extract from the systematic literature reviews  
496 undertaken as the background for the WHO guidelines on core components of infection  
497 prevention and control programmes at the national and acute health care facility level.  
498 Technical documents, World Health Organization.
- 499 26. Pickering AJ, Davis J, Boehm AB. 2011. Efficacy of alcohol-based hand sanitizer on hands  
500 soiled with dirt and cooking oil. *J Water Health* 9:429–433.
- 501 27. Zhao P, Li Y. 2019. New sequential-touch method to determine bacterial contact transfer  
502 rate from finger to surface. *Journal of Applied Microbiology* 127:605–615.
- 503 28. NASA. 1995. Anthropometry and Biomechanics Man-Systems Integration Standards.
- 504 29. Hall C. 1997. External pressure at the hand during object handling and work with tools.  
505 *International Journal of Industrial Ergonomics* 20:191–206.
- 506 30. Ferguson A, Biddle D, Coleman S, Bursac Z, Johnson W. 2009. In-vitro soil adherence for  
507 dermal exposure using a controlled mechanical chamber. *Journal of Applied Sciences*  
508 *Research* 5:232–243.
- 509 31. Link L, Lukens S, Bush MA. 1995. Spherical grip strength in children 3 to 6 years of age.  
510 *Am J Occup Ther* 49:318–326.

511 32. EPA. 2001. Method 1602: Male-specific (F+) and Somatic Coliphage in Water by Single  
512 Agar Layer (SAL) Procedure 38.

513



514 **Legends**

515 **Figure 1.** Pathway of transmission from contaminated fomites. First the individual contacts a  
516 surface, on which the individual picks up or deposits infective virus particles. Lastly, the  
517 individual transfers the infective virus from their hand to an area of their body where infection  
518 occurs, or to an additional surface.

519

520 **Figure 2.** Outline of experimental procedure up until the contact events. The procedure outlines  
521 the initial hand washing step, followed by the wait time for Experiment A or B, an example of  
522 surface inoculation, an example of hand inoculation, the wait time for the inoculum to dry, and  
523 the contact events. In the example surfaces inoculation, the leftmost square represents where the  
524 virus was not applied, but where the transfer from the fingerpad to the surface would occur. The  
525 middle square represents where the virus was applied (indicating transfer from the surface to the  
526 fingerpad) and the rightmost is the control. In the example hand inoculation, the hands are  
527 duplicates. On the middle finger and thumb there is no virus applied, but represents where the  
528 transfer from the chosen surface and 2<sup>nd</sup> surface to the fingerpad will occur, respectively. On the  
529 index finger and ring finger is where there is virus applied, and where transfer between the finger  
530 and the respective surfaces will occur. The pinky is a control.

531

532 **Figure 3.** Boxplots of transfer rates for different surfaces. The upper and lower whiskers show  
533 the maximum and minimum values, respectively (excluding outliers defined by the interquartile  
534 range criterion). The lower and upper edges of the represent the lower and upper quartile,  
535 respectively. The horizontal line within the box indicates the median. The points beyond the  
536 whiskers represent outliers. The data are broken down by ‘virus type’, ‘surface type’, ‘time since

537 last handwash’, and ‘direction of transfer’. “Unwashed” represents 1 hour since last handwash  
538 and “washed” represents 0 hour since last handwash. “F->S” represents fingerpad to surface  
539 transfer and “S->F” represents surface to fingerpad transfer.

540

541 **Figure 4.** Phi6 (A) and MS2 (B) histogram distributions, overlaid with probability distribution  
542 functions. The functions used to model the data are beta (- - -). The alpha and beta shape  
543 parameters, as well as the goodness of fit p-value, are also shown.

544 **Tables**

545 **Table 1.** A summary of previous studies investigating viral transfer rates. Included in the table are various experimental variables, including virus species,  
 546 inanimate surface, inoculation volume, contact time, inoculum dry time, and contact pressure.

| Reference                | Virus Species                                | Surfaces                                                                                                            | Inoculation Volume | Contact Time | Inoculum Dry Time | Contact Pressure                                  | Transfer Rate                                                               |
|--------------------------|----------------------------------------------|---------------------------------------------------------------------------------------------------------------------|--------------------|--------------|-------------------|---------------------------------------------------|-----------------------------------------------------------------------------|
| Reed, 1975 (13)          | Rhinovirus                                   | Plastic pen<br>Table<br>Stainless steel                                                                             | 2-5.5 µL           | 15 s         | 2-10 min          | Not recorded                                      | Mean up to 0.46                                                             |
| Ansari et al., 1988 (11) | Rotavirus                                    | Stainless steel                                                                                                     | 10 µL              | 10 s         | 20 min            | 1 kg/cm <sup>2</sup>                              | Mean up to 16.8                                                             |
| Ansari et al., 1991 (5)  | Human parainfluenza virus 3<br>Rhinovirus 14 | Stainless Steel                                                                                                     | 10 µL              | 5 s          | 20 min            | 1.0 kg/cm <sup>2</sup>                            | Mean up to 0.02                                                             |
| Mbithi et al., 1992 (12) | Hepatitis A                                  | Stainless Steel                                                                                                     | 10 µL              | 10 s         | 20 min            | 0.2 kg/cm <sup>2</sup> to<br>1 kg/cm <sup>2</sup> | Mean up to 0.27                                                             |
| Julian et al., 2010 (10) | MS2<br>φX174<br>fr                           | Glass                                                                                                               | 5 µL               | 10 s         | 10 min            | 0.25 kg/cm <sup>2</sup>                           | Mean of 0.23                                                                |
| Lopez et al., 2013 (1)   | MS2<br>Poliovirus 1                          | Acrylic<br>Glass<br>Ceramic tile<br>Laminate<br>Stainless steel<br>Granite<br>Cotton<br>Polyester<br>Paper Currency | 10 µL              | 10 s         | 30 min            | 1.0 kg/cm <sup>2</sup>                            | Nonporous Surfaces:<br>Mean up to 0.80<br>Porous Surfaces: Mean<br>of <0.07 |
| This Study               | MS2<br>Phi6                                  | Plastic<br>Stainless steel<br>Painted Wood                                                                          | 10 µL              | 10 s         | Up to 30<br>min   | 0.25 kg/cm <sup>2</sup>                           | Mean up to 0.26                                                             |

547 **Table 2.** Descriptive statistics for the transfer rate of Phi6 and MS2. Statistics are broken down by virus type,  
 548 surface, time since last handwash, and direction of transfer. Included in the statistics are the number of trials for each  
 549 condition, the mean, the median, and the standard deviation of the transfer rate.

| <b>Phi6</b>     |                                 |                              |                    |             |               |                           |
|-----------------|---------------------------------|------------------------------|--------------------|-------------|---------------|---------------------------|
| <b>Surface</b>  | <b>Time since last handwash</b> | <b>Direction of transfer</b> | <b># of Trials</b> | <b>Mean</b> | <b>Median</b> | <b>Standard Deviation</b> |
| Stainless steel | 1 hour                          | Surface to fingerpad         | 30                 | 0.23        | 0.19          | 0.19                      |
|                 |                                 | Fingerpad to surface         | 25                 | 0.18        | 0.16          | 0.20                      |
|                 | 0 hour                          | Surface to fingerpad         | 30                 | 0.20        | 0.17          | 0.15                      |
|                 |                                 | Fingerpad to surface         | 22                 | 0.22        | 0.21          | 0.15                      |
| Plastic         | 1 hour                          | Surface to fingerpad         | 30                 | 0.28        | 0.22          | 0.23                      |
|                 |                                 | Fingerpad to surface         | 22                 | 0.17        | 0.09          | 0.19                      |
|                 | 0 hour                          | Surface to fingerpad         | 30                 | 0.22        | 0.21          | 0.14                      |
|                 |                                 | Fingerpad to surface         | 22                 | 0.15        | 0.11          | 0.12                      |
| Wood            | 1 hour                          | Surface to fingerpad         | 28                 | 0.05        | 0.01          | 0.07                      |
|                 |                                 | Fingerpad to surface         | 26                 | 0.13        | 0.09          | 0.14                      |
|                 | 0 hour                          | Surface to fingerpad         | 27                 | 0.08        | 0.03          | 0.10                      |
|                 |                                 | Fingerpad to surface         | 22                 | 0.07        | 0.05          | 0.06                      |

  

| <b>MS2</b>      |                                 |                              |                    |             |               |                           |
|-----------------|---------------------------------|------------------------------|--------------------|-------------|---------------|---------------------------|
| <b>Surface</b>  | <b>Time since last handwash</b> | <b>Direction of transfer</b> | <b># of Trials</b> | <b>Mean</b> | <b>Median</b> | <b>Standard Deviation</b> |
| Stainless steel | 1 hour                          | Surface to fingerpad         | 30                 | 0.34        | 0.33          | 0.12                      |
|                 |                                 | Fingerpad to surface         | 30                 | 0.13        | 0.08          | 0.12                      |
|                 | 0 hour                          | Surface to fingerpad         | 30                 | 0.37        | 0.37          | 0.12                      |
|                 |                                 | Fingerpad to surface         | 30                 | 0.18        | 0.13          | 0.17                      |
| Plastic         | 1 hour                          | Surface to fingerpad         | 30                 | 0.37        | 0.33          | 0.14                      |
|                 |                                 | Fingerpad to surface         | 30                 | 0.16        | 0.11          | 0.16                      |
|                 | 0 hour                          | Surface to fingerpad         | 30                 | 0.40        | 0.37          | 0.18                      |
|                 |                                 | Fingerpad to surface         | 29                 | 0.15        | 0.11          | 0.17                      |
| Wood            | 1 hour                          | Surface to fingerpad         | 30                 | 0.30        | 0.29          | 0.18                      |
|                 |                                 | Fingerpad to surface         | 28                 | 0.22        | 0.17          | 0.17                      |
|                 | 0 hour                          | Surface to fingerpad         | 30                 | 0.33        | 0.29          | 0.20                      |
|                 |                                 | Fingerpad to surface         | 29                 | 0.21        | 0.19          | 0.18                      |

## **Figures**

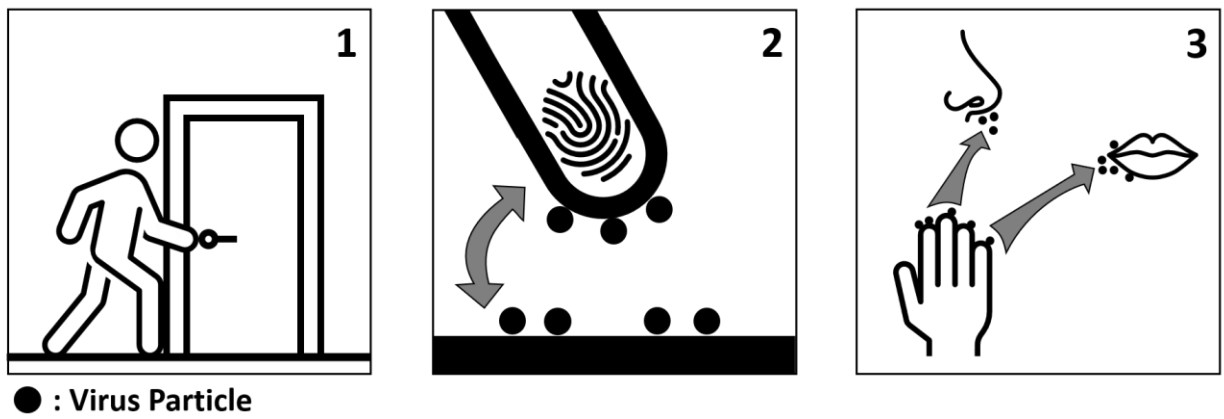

**Figure 1**

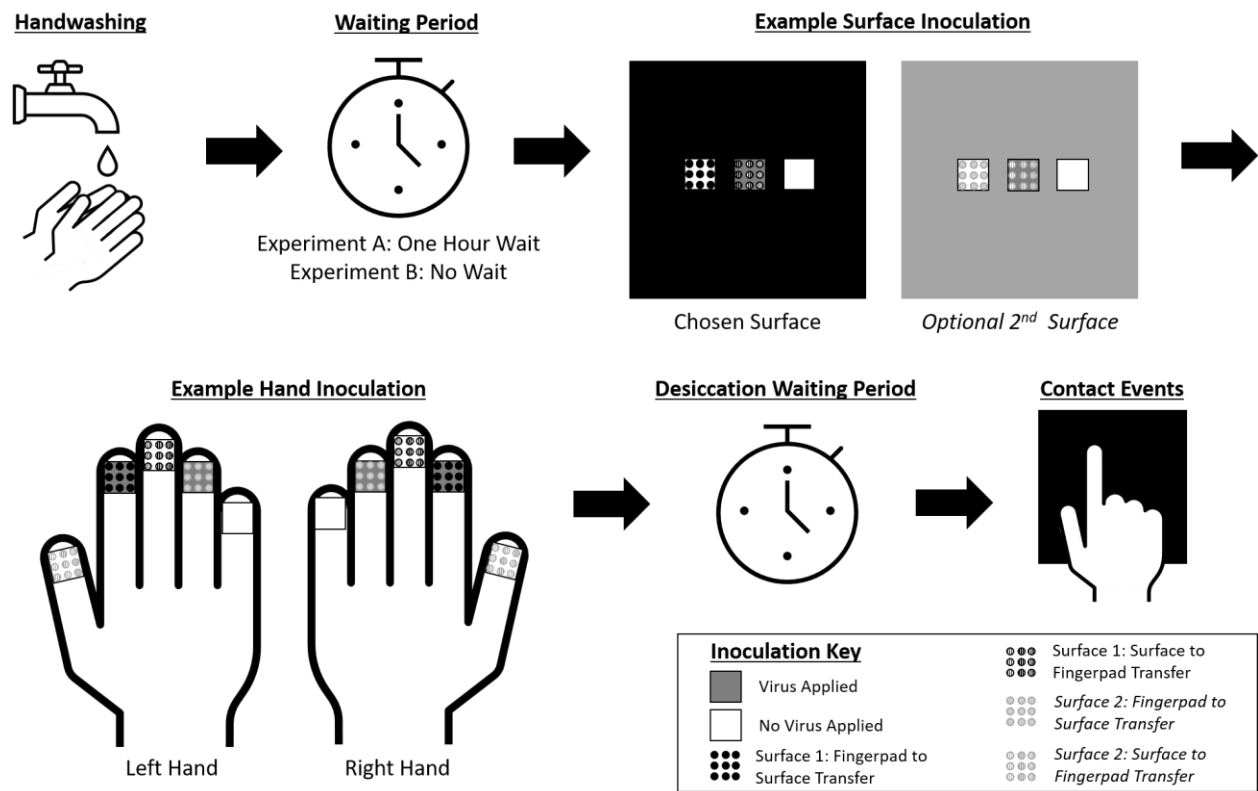

Figure 2

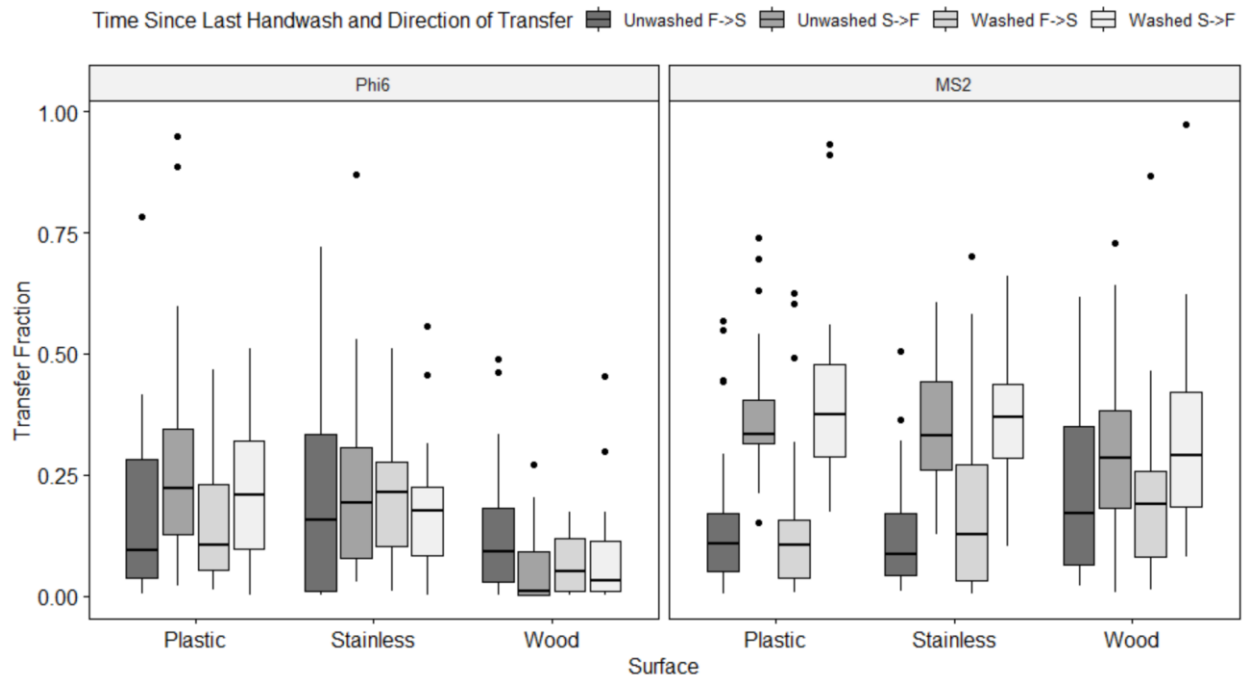

**Figure 3**

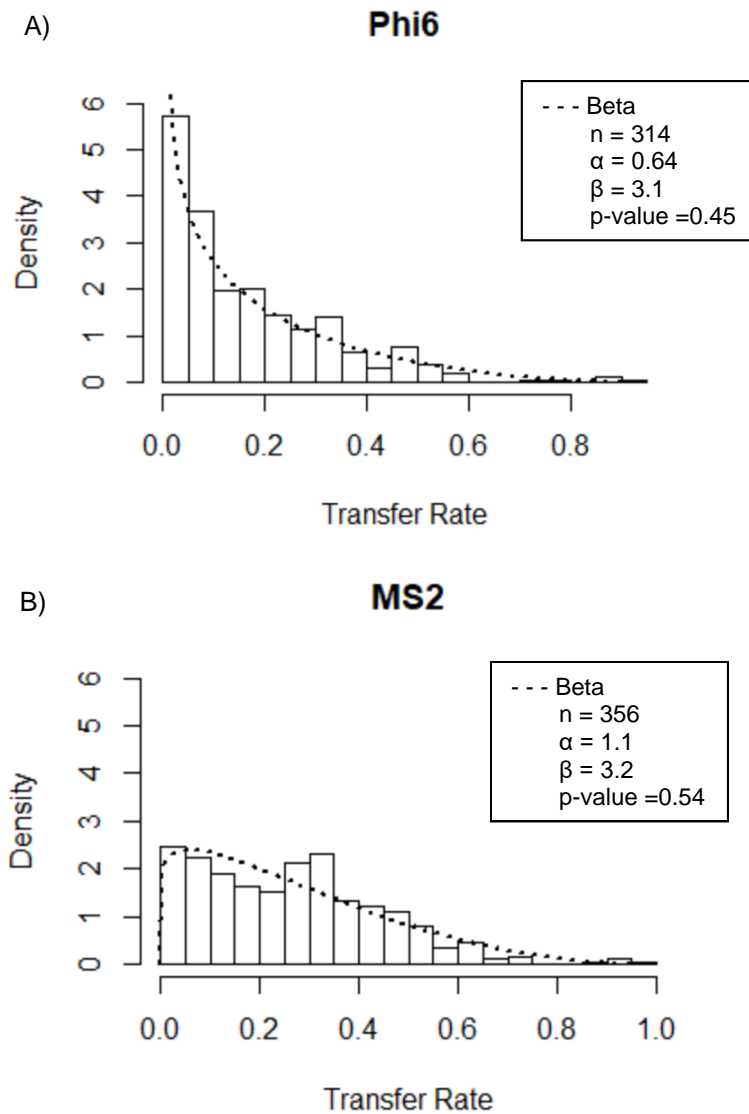

**Figure 4**
